# Supplementary material for: Nematode distributions as spatial null models for macroinvertebrate species richness across environmental gradients: A case from mountain lakes
Source: PubMed Central journal article supplement (PMC5415540; doi:10.1002/ece3.2842), 2017-03-23
Supplement: ECE3-7-3016-s001.pdf [file ECE3-7-3016-s001.pdf]

## Supporting Information to

*Nematode distributions as spatial null models for macroinvertebrate species richness  
across environmental gradients: A case from mountain lakes*

Guillermo de Mendoza, Walter Traunspurger, Alejandro Palomo and Jordi Catalan

*Ecology and Evolution*

**Table S1** Species richness regression statistics considering all species in each group.

**Figure S1** Species richness patterns across altitude using all species in each group.

**Appendix S1** Taxonomic determination of nematodes, oligochaetes and insects.

**Appendix S2** Species list, with codes used, and details on altitudinal distribution.

**Table S1**

**Table S1** Simple linear and quadratic regression statistics of species richness against altitude, for each taxonomic group. All species are taken into account (number of species in each group indicated in brackets), with identical results than those provided when considering only species present in at least four lakes (Table 1). For each model,  $R^2$ , adjusted  $R^2$ ,  $P$ -values, and AICc values are shown. The best model (simple linear or quadratic) is defined as the one with the lowest AIC value (highlighted in boldface). \*  $P < 0.05$ , \*\*  $P < 0.01$ , \*\*\*  $P < 0.001$ .

| <b>Taxonomic group and model</b> | <b><math>R^2</math></b> | <b>Adj. <math>R^2</math></b> | <b><math>P</math>-value</b> | <b>AICc</b>   |
|----------------------------------|-------------------------|------------------------------|-----------------------------|---------------|
| <b>Nematoda (S = 30)</b>         |                         |                              |                             |               |
| Simple linear                    | 0.0009                  | -0.0112                      | 0.7852                      | 417.38        |
| Quadratic                        | 0.0821                  | 0.0588                       | 0.0340 *                    | <b>412.65</b> |
| <b>Oligochaeta (S = 35)</b>      |                         |                              |                             |               |
| Simple linear                    | 0.1003                  | 0.0890                       | 0.0038 **                   | 399.45        |
| Quadratic                        | 0.1335                  | 0.1116                       | 0.0035 **                   | <b>398.57</b> |
| <b>Chironomidae (S = 59)</b>     |                         |                              |                             |               |
| Simple linear                    | 0.1208                  | 0.1098                       | 0.0014 **                   | 474.61        |
| Quadratic                        | 0.2413                  | 0.2221                       | < 0.0001 ***                | <b>464.73</b> |
| <b>Insecta (other) (S = 42)</b>  |                         |                              |                             |               |
| Simple linear                    | 0.0376                  | 0.0255                       | 0.0811                      | 343.51        |
| Quadratic                        | 0.1863                  | 0.1657                       | 0.0003 ***                  | <b>331.95</b> |

Figure S1

**Figure S1** Species richness patterns across altitude in each taxonomic group, taking into account all species. The quadratic regression model was selected over the simple linear model, in all cases (see Table S1). The same results were obtained when using only species present in at least four lakes (see Figure 6).

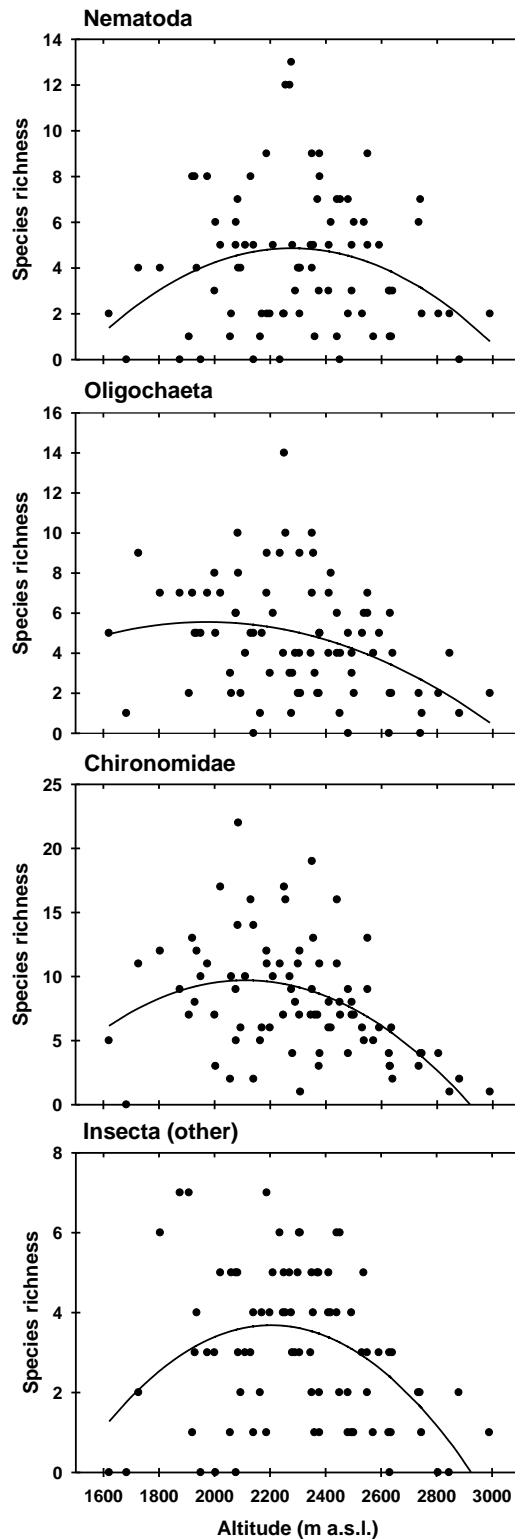

## Appendix S1

**Appendix S1** Taxonomic determination of nematodes, oligochaetes and insects. Nematodes were determined following Abebe et al. (2006). Oligochaetes were previously determined (Collado and de Mendoza 2009), following the taxonomical works of Sperber (1948), Nielsen and Christensen (1959, 1961, 1963), and Brinkhurst and Jamieson (1971). Chironomids were mostly found as larval material, which could be determined under the microscope following mainly Wiederholm (1983) and Rieradevall and Brooks (2001), but also Cranston (1982), with the help of M. Rieradevall (G. de Mendoza, M. Rieradevall and J. Catalan, *unpublished manuscript*). More specific references were also used for particular genera, such as *Corynoneura* and *Psectrocladius* (M. Rieradevall, *personal communication*), *Chironomus* (Laville 1971), *Cricotopus* (Hirvenoja 1973; Nyman et al. 2005), and those of the tribe Tanytarsini (Ekrem 2004; Heiri et al. 2004; M. Rieradevall, *personal communication*). Pupae and pupal exuviae found were in most cases determined to species following mainly Langton (1991), but also Wiederholm (1986), and Wilson (1995) as a starting reference. As in the case of larvae, Hirvenoja (1973) was also used for *Cricotopus* and Ekrem (2004) for *Tanytarsus*. Within non-chironomid insects, species determination also followed specific references; for Coleoptera and Trichoptera, see de Mendoza et al. (2012) and de Mendoza et al. (2015), respectively, and references therein; for Megaloptera, Kaiser (1977) and Elliott (1996) were used; and for other groups the taxonomic determinations were obtained through the assistance of taxonomic experts in their respective fields (Ephemeroptera and Plecoptera, M.A. Puig and N. Ubero-Pascal; Odonata, A. Cordero; Hemiptera, A. Millán; non-chironomid Diptera, E. Bulánková and G. González).

## Appendix S1

### References

- Abebe, E., I. Andr ssy, and W. Traunspurger. 2006. Freshwater nematodes: ecology and taxonomy. CABI, Wallingford.
- Brinkhurst, R. O., and B. G. M. Jamieson. 1971. Aquatic Oligochaeta of the world. Oliver & Boyd, Edinburgh.
- Collado, R., and G. de Mendoza. 2009. Environmental factors and distribution of littoral oligochaetes in Pyrenean lakes. *Advances in Limnology* 62:215–244.
- Cranston, P. S. 1982. A key to the larvae of the British Orthocladiinae (Chironomidae). Freshwater Biological Association, Ambleside.
- de Mendoza, G., E. Rico, and J. Catalan. 2012. Predation by introduced fish constrains the thermal distribution of aquatic Coleoptera in mountain lakes. *Freshwater Biology* 57:803–814.
- de Mendoza, G., M. Ventura, and J. Catalan. 2015. Environmental factors prevail over dispersal constraints in determining the distribution and assembly of Trichoptera species in mountain lakes. *Ecology and Evolution* 5:2518–2532.
- Ekrem, T. 2004. Immature stages of European *Tanytarsus* species I. The *eminulus*-, *gregarius*-, *lugens*-, and *mendax* species groups (Diptera, Chironomidae). *Mitteilungen aus dem Museum f r Naturkunde in Berlin, Deutsche Entomologische Zeitschrift* 51:97–146.
- Elliott, J. M. 1996. British freshwater Megaloptera and Neuroptera: a key with ecological notes. Freshwater Biological Association, Ambleside.
- Heiri, O., T. Ekrem, and E. Willassen. 2004. Larval head capsules of European *Micropsectra*, *Paratanytarsus* and *Tanytarsus* (Diptera: Chironomidae: Tanytarsini). Version 1.0, August 24, 2004. <http://www3.bio.uu.nl/palaeo/Chironomids/Tanytarsini/Intro.htm> [Downloaded on March 20, 2007].
- Hirvenoja, M. 1973. Revision der Gattung *Cricotopus* van der Wulp und ihrer Verwandten (Diptera, Chironomidae). *Annales Zoologici Fennici* 10:1–363.
- Kaiser, E. W. 1977.  g og larver af 6 *Sialis*-arter fra Skandinavien og Finland. *Flora Fauna, Arhus* 83:65–79.
- Langton, P. H. 1991. A key to pupal exuviae of West Palearctic Chironomidae. Privately published by P.H. Langton, 3 St Felix Road, Ramsey Forty Foot, Huntingdon, Cambridgeshire.

## Appendix S1

- Laville, H. 1971. Recherches sur les chironomides (Diptera) lacustres du Massif de Néouvielle (Hautes-Pyrénées). Première partie: systematique, écologie, phénologie. *Annales de Limnologie* 7:173–332.
- Nielsen, C. O., and B. Christensen. 1959. The Enchytraeidae, critical revision and taxonomy of European species. *Natura Jutlandica* 8/9:1–160.
- Nielsen, C. O., and B. Christensen. 1961. The Enchytraeidae, critical revision and taxonomy of European species. *Natura Jutlandica* 10 (Suppl. 1):1–23.
- Nielsen, C. O., and B. Christensen. 1963. The Enchytraeidae, critical revision and taxonomy of European species. *Natura Jutlandica* 10 (Suppl. 2):1–19.
- Nyman, M., A. Korhola, and S. J. Brooks. 2005. The distribution and diversity of Chironomidae (Insecta: Diptera) in western Finnish Lapland, with special emphasis on shallow lakes. *Global Ecology and Biogeography* 14:137–153.
- Rieradevall, M., and S. J. Brooks. 2001. An identification guide to subfossil Tanypodinae larvae (Insecta: Diptera: Chironomidae) based on cephalic setation. *Journal of Paleolimnology* 25:81–99.
- Sperber, C. 1948. A taxonomical study of the Naididae. *Zoologiska Bidrag från Uppsala* 28:1–296.
- Wiederholm, T. 1983. Chironomidae of the Holarctic region. Keys and diagnoses. Part 1. Larvae. *Entomologica Scandinavica Suppl.* 19:1–457.
- Wiederholm, T. 1986. Chironomidae of the Holarctic region. Keys and diagnoses. Part 2. Pupae. *Entomologica Scandinavica Suppl.* 28:1–482.
- Wilson, R. S. 1995. A practical key to the genera of pupal exuviae of the British Chironomidae (Diptera: Insecta), unpublished revised version, August 1995, of Wilson, R. S. and J. D. McGill, 1982, A practical key to the genera of pupal exuviae of the British Chironomidae (Diptera: Insecta), University of Bristol Printing Office, Bristol.

## Appendix S2

**Appendix S2** Species considered, with the associated numbers ('#') used in the main manuscript (Figures 2, 4 and 5), separately for each taxonomic group. Detailed information is given for the frequency of occurrence of species ('Freq.', referred to as the number of lakes where the species was collected, max. 82); for the altitudinal bias in distributions ('Bias', indicating whether the bias is positive or negative in square brackets when significant,  $P < 0.05$  in Figure 3); and for the narrow ranging character of species ('Narrow', indicated by asterisks when significant,  $P < 0.05$  in Figure 4). Species found in less than four lakes were not considered (n/c) in the main manuscript, but are used in the Supporting Information analyses of Table S1 and Figure S1. Some individuals were not determined to species-level, but belonged to the same morphotype; these cases were considered as of the same species, except in those instances where one morphotype was confidently representing more than one species, thus being discarded from statistical analysis in both the main manuscript and the Supporting Information (as it was the case of the few taxa determined to family-level). *Micropsetra*, *Tanytarus* and *Paratanytarsus* types were assigned following type descriptions of Heiri et al. (2004). In nematodes, oligochaetes and non-chironomid insects, the taxonomic Order to which each species belongs is indicated. As chironomids are a family of insects in the Order Diptera, in this case, the subfamily or tribe of each species is shown.

## Appendix S2

| Nematoda                                             |                               |    |       |      |        |
|------------------------------------------------------|-------------------------------|----|-------|------|--------|
| Species name                                         | Family (Order)                | #  | Freq. | Bias | Narrow |
| <i>Ironus longicaudatus</i> de Man                   | Ironidae (Enoplida)           | 15 | 17    |      | *      |
| <i>Ironus tenuicaudatus</i> de Man                   | Ironidae (Enoplida)           | 4  | 16    |      |        |
| <i>Eutobrilus grandipapillatus</i> (Brakenhoff)      | Tobrilidae (Triplonchida)     | 12 | 31    |      |        |
| <i>Semitobrilus pellucidus</i> (Bastian)             | Tobrilidae (Triplonchida)     | 7  | 15    |      |        |
| <i>Tobrilus gracilis</i> (Bastian)                   | Tobrilidae (Triplonchida)     | 19 | 8     |      |        |
| <i>Tripyla glomerans</i> Bastian                     | Tripylidae (Triplonchida)     | 14 | 35    |      |        |
| <i>Crocodyrlaimus flavomaculatus</i> (Linstow)       | Dorylaimidae (Dorylaimida)    | 2  | 9     |      |        |
| <i>Dorylaimus</i> cf. <i>stagnalis</i> Dujardin      | Dorylaimidae (Dorylaimida)    | 9  | 45    |      |        |
| <i>Mesodorylaimus</i> sp.1 ( <i>conurus</i> ?)       | Dorylaimidae (Dorylaimida)    | 13 | 4     |      |        |
| <i>Prodorylaimus</i> cf. <i>rotundiceps</i> Loof     | Dorylaimidae (Dorylaimida)    | 8  | 5     |      |        |
| <i>Paractinolaimus macrolaimus</i> (de Man)          | Actinolaimidae (Dorylaimida)  | 6  | 16    |      | *      |
| <i>Epidorylaimus consobrinus</i> (de Man)            | Qudsianematidae (Dorylaimida) | 16 | 44    |      |        |
| <i>Eudorylaimus similis</i> (de Man)                 | Qudsianematidae (Dorylaimida) | 20 | 7     |      |        |
| <i>Aporcelaimellus obtusicaudatus</i> (Bastian)      | Aporcelaimidae (Dorylaimida)  | 10 | 24    |      |        |
| <i>Anatonchus dolichurus</i> (Ditlevsen)             | Anatonchidae (Mononchida)     | 1  | 12    | [-]  |        |
| <i>Coomansus zschokkei</i> (Menzel)                  | Mononchidae (Mononchida)      | 17 | 9     |      |        |
| <i>Mononchus truncatus</i> Bastian                   | Mononchidae (Mononchida)      | 18 | 19    |      |        |
| <i>Ethmolaimus</i> cf. <i>pratensis</i> de Man       | Ethmolaimidae (Chromadorida)  | 3  | 4     |      |        |
| <i>Plectus aquatilis</i> Andr ssy                    | Plectidae (Plectida)          | 5  | 8     |      |        |
| <i>Plectus cirratus</i> Bastian                      | Plectidae (Plectida)          | 11 | 4     |      |        |
| <u>Discarded (present in less than four lakes)</u>   |                               |    |       |      |        |
| <i>Tobrilus</i> sp.2                                 | Tobrilidae (Triplonchida)     | -  | 1     | n/c  | n/c    |
| <i>Tripyla filicaudata</i> de Man                    | Tripylidae (Triplonchida)     | -  | 1     | n/c  | n/c    |
| <i>Ischiodorylaimus</i> cf. <i>cognatus</i> Andr ssy | Dorylaimidae (Dorylaimida)    | -  | 1     | n/c  | n/c    |
| <i>Prodorylaimus filiarum</i> Andr ssy               | Dorylaimidae (Dorylaimida)    | -  | 1     | n/c  | n/c    |
| <i>Clarkus papillatus</i> (Bastian)                  | Mononchidae (Mononchida)      | -  | 2     | n/c  | n/c    |
| <i>Prionchulus</i> cf. <i>punctatus</i> (Cobb)       | Mononchidae (Mononchida)      | -  | 1     | n/c  | n/c    |
| <i>Prionchulus muscorum</i> (Dujardin)               | Mononchidae (Mononchida)      | -  | 2     | n/c  | n/c    |
| <i>Achromadora terricola</i> (de Man)                | Achromadoridae (Chromadorida) | -  | 2     | n/c  | n/c    |
| <i>Monhystera</i> cf. <i>paludicola</i> de Man       | Monhysteridae (Monhysterida)  | -  | 2     | n/c  | n/c    |
| <i>Aphanolaimus aquaticus</i> von Daday              | Aphanolaimidae (Plectida)     | -  | 2     | n/c  | n/c    |
| <u>Discarded (not determined to species level)</u>   |                               |    |       |      |        |
| Mermithidae (undetermined)                           | Mermithidae (Mermithida)      | -  | 31    | n/c  | n/c    |



## Appendix S2

### Oligochaeta

| Species name                                  | Family (Order)               | #  | Freq. | Bias | Narrow |
|-----------------------------------------------|------------------------------|----|-------|------|--------|
| <i>Lumbriculus variegatus</i> (Müller)        | Lumbriculidae (Lumbriculida) | 17 | 26    |      |        |
| <i>Stylogdrilus heringianus</i> Claparède     | Lumbriculidae (Lumbriculida) | 21 | 23    |      |        |
| <i>Bothrioneurum vej dovskyanum</i> Stolc     | Naididae (Haplotaxida)       | 3  | 4     | [-]  |        |
| <i>Chaetogaster diaphanus</i> (Gruithuisen)   | Naididae (Haplotaxida)       | 4  | 7     |      |        |
| <i>Chaetogaster diastrophus</i> (Gruithuisen) | Naididae (Haplotaxida)       | 5  | 7     |      |        |
| <i>Limnodrilus hoffmeisteri</i> Claparède     | Naididae (Haplotaxida)       | 20 | 8     |      |        |
| <i>Nais barbata</i> Müller                    | Naididae (Haplotaxida)       | 2  | 5     |      |        |
| <i>Nais bretscheri</i> Michaelsen             | Naididae (Haplotaxida)       | 9  | 15    |      |        |
| <i>Nais cf. communis</i> Piguet               | Naididae (Haplotaxida)       | 18 | 6     |      |        |
| <i>Nais pardalis</i> Piguet                   | Naididae (Haplotaxida)       | 14 | 6     |      |        |
| <i>Nais pseudobtusa</i> Piguet                | Naididae (Haplotaxida)       | 7  | 12    | [-]  |        |
| <i>Nais simplex</i> Piguet                    | Naididae (Haplotaxida)       | 11 | 24    | [-]  | *      |
| <i>Nais variabilis</i> Piguet                 | Naididae (Haplotaxida)       | 15 | 53    |      |        |
| <i>Slavina appendiculata</i> (d'Udekem)       | Naididae (Haplotaxida)       | 16 | 4     |      |        |
| <i>Specaria josinae</i> (Vejdovský)           | Naididae (Haplotaxida)       | 10 | 42    | [-]  | *      |
| <i>Spirosperma ferox</i> (Eisen)              | Naididae (Haplotaxida)       | 6  | 10    | [-]  | *      |
| <i>Tubifex tubifex</i> (Müller)               | Naididae (Haplotaxida)       | 22 | 17    |      |        |
| <i>Uncinai s uncinata</i> (Ørsted)            | Naididae (Haplotaxida)       | 1  | 4     | [-]  |        |
| <i>Vejdovskyaella comata</i> (Vejdovský)      | Naididae (Haplotaxida)       | 8  | 14    | [-]  |        |
| <i>Cognettia glandulosa</i> (Michaelsen)      | Enchytraeidae (Haplotaxida)  | 19 | 43    |      | *      |
| <i>Cognettia sphagnetorum</i> (Vejdovský)     | Enchytraeidae (Haplotaxida)  | 23 | 16    | [+]  |        |
| <i>Cognettia</i> sp.3                         | Enchytraeidae (Haplotaxida)  | 13 | 10    |      |        |
| <i>Henlea perpusilla</i> Friend               | Enchytraeidae (Haplotaxida)  | 12 | 6     |      |        |

#### Discarded (present in less than four lakes)

|                                                     |                              |   |   |     |     |
|-----------------------------------------------------|------------------------------|---|---|-----|-----|
| <i>Chaetogaster crystallinus</i> Vejdovský          | Naididae (Haplotaxida)       | - | 2 | n/c | n/c |
| <i>Nais alpina</i> Sperber                          | Naididae (Haplotaxida)       | - | 2 | n/c | n/c |
| <i>Pristina aequisetata</i> Bourne                  | Naididae (Haplotaxida)       | - | 2 | n/c | n/c |
| <i>Pristina cf. jenkinae</i> (Stephenson)           | Naididae (Haplotaxida)       | - | 1 | n/c | n/c |
| <i>Pristina</i> sp.3                                | Naididae (Haplotaxida)       | - | 1 | n/c | n/c |
| <i>Buchholzia appendiculata</i> (Buchholz)          | Enchytraeidae (Haplotaxida)  | - | 1 | n/c | n/c |
| <i>Henlea</i> sp.2                                  | Enchytraeidae (Haplotaxida)  | - | 3 | n/c | n/c |
| <i>Mesenchytraeus armatus</i> (Levinsen)            | Enchytraeidae (Haplotaxida)  | - | 1 | n/c | n/c |
| <i>Fridericia cf. bulboides</i> Niels. & Christens. | Enchytraeidae (Haplotaxida)  | - | 1 | n/c | n/c |
| <i>Fridericia</i> sp.2                              | Enchytraeidae (Haplotaxida)  | - | 1 | n/c | n/c |
| Lumbricidae (undetermined) <sup>1</sup>             | Lumbricidae (Haplotaxida)    | - | 1 | n/c | n/c |
| <i>Aeolosoma</i> sp.                                | Aeolosomatidae (Haplotaxida) | - | 2 | n/c | n/c |

#### Discarded (not determined to species level)

|                              |                             |   |    |     |     |
|------------------------------|-----------------------------|---|----|-----|-----|
| <i>Cernosvitoviella</i> spp. | Enchytraeidae (Haplotaxida) | - | 49 | n/c | n/c |
| <i>Achaeta</i> spp.          | Enchytraeidae (Haplotaxida) | - | 20 | n/c | n/c |

<sup>1</sup> Only one individual found, therefore only one species.

## Appendix S2

| Chironomidae                                            |                   |    |       |      |        |  |
|---------------------------------------------------------|-------------------|----|-------|------|--------|--|
| Species name                                            | Subfamily / tribe | #  | Freq. | Bias | Narrow |  |
| <i>Ablabesmyia longistyla</i> Fittkau                   | Tanypodinae       | 19 | 26    | [-]  | *      |  |
| <i>Ablabesmyia monilis</i> (Linnaeus)                   | Tanypodinae       | 8  | 25    | [-]  |        |  |
| <i>Ablabesmyia phatta</i> (Egger)                       | Tanypodinae       | 32 | 9     |      |        |  |
| <i>Trissopelopia</i> sp.                                | Tanypodinae       | 24 | 7     |      |        |  |
| <i>Conchapelopia</i> sp.                                | Tanypodinae       | 22 | 6     |      |        |  |
| <i>Thienemannimyia</i> sp.                              | Tanypodinae       | 5  | 6     | [-]  |        |  |
| <i>Macropelopia</i> gr. <i>notata</i>                   | Tanypodinae       | 33 | 23    |      | *      |  |
| <i>Macropelopia</i> gr. <i>nebulosa</i>                 | Tanypodinae       | 34 | 39    |      |        |  |
| <i>Prodiamesa olivacea</i> (Meigen)                     | Prodiamesinae     | 2  | 5     | [-]  |        |  |
| <i>Chaetocladius</i> sp.                                | Orthoclaadiinae   | 17 | 6     |      |        |  |
| <i>Corynoneura lacustris</i> -type                      | Orthoclaadiinae   | 26 | 37    |      | *      |  |
| <i>Cricotopus pirifer</i> Hirvenoja                     | Orthoclaadiinae   | 3  | 11    | [-]  |        |  |
| <i>Cricotopus</i> gr. <i>reversus</i>                   | Orthoclaadiinae   | 21 | 7     |      |        |  |
| <i>Cricotopus</i> gr. <i>sylvestris</i>                 | Orthoclaadiinae   | 11 | 15    | [-]  |        |  |
| <i>Heterotrissoclaadius marcidus</i> (Walker)           | Orthoclaadiinae   | 31 | 64    |      | *      |  |
| <i>Metricnemus</i> gr. <i>hygropetricus</i>             | Orthoclaadiinae   | 15 | 8     |      |        |  |
| <i>Paratrithoclaadius</i> sp.                           | Orthoclaadiinae   | 36 | 5     | [+]  |        |  |
| <i>Psectrocladius</i> gr. <i>psilopterus</i>            | Orthoclaadiinae   | 27 | 16    |      | *      |  |
| <i>Psectrocladius</i> gr. <i>sordidellus</i>            | Orthoclaadiinae   | 7  | 16    | [-]  |        |  |
| <i>Synorthoclaadius semivirens</i> (Kieffer)            | Orthoclaadiinae   | 28 | 35    |      |        |  |
| <i>Thienemannia</i> sp.                                 | Orthoclaadiinae   | 9  | 7     |      |        |  |
| <i>Chironomus commutatus</i> -type                      | Chironomini       | 1  | 13    | [-]  |        |  |
| <i>Cladopelma</i> sp.                                   | Chironomini       | 4  | 8     | [-]  |        |  |
| <i>Microtendipes</i> gr. <i>pedellus</i>                | Chironomini       | 10 | 14    | [-]  | *      |  |
| <i>Pagastiella orophila</i> (Edwards)                   | Chironomini       | 13 | 10    | [-]  | *      |  |
| <i>Paracladopelma</i> sp.                               | Chironomini       | 16 | 9     |      |        |  |
| <i>Polypedilum nubens</i> -type                         | Chironomini       | 14 | 15    | [-]  |        |  |
| <i>Polypedilum albicorne</i> -type                      | Chironomini       | 6  | 11    | [-]  |        |  |
| <i>Pseudochironomus prasinatus</i> (Stæger)             | Pseudochironomini | 23 | 5     |      |        |  |
| <i>Cladotanytarsus</i> gr. <i>mancus</i>                | Tanytarsini       | 12 | 13    | [-]  |        |  |
| <i>Micropsectra radialis</i> -type                      | Tanytarsini       | 35 | 15    | [+]  |        |  |
| <i>Micropsectra</i> C-type                              | Tanytarsini       | 20 | 4     |      |        |  |
| <i>Nezavrelia</i> A-type ( <i>luteola</i> ?)            | Tanytarsini       | 29 | 6     |      |        |  |
| <i>Paratanytarsus austriacus</i> -type                  | Tanytarsini       | 30 | 56    |      |        |  |
| <i>Paratanytarsis penicillatus</i> -type                | Tanytarsini       | 18 | 28    | [-]  | *      |  |
| <i>Tanytarsus lugens</i> -type                          | Tanytarsini       | 25 | 41    |      |        |  |
| <br><u>Discarded (present in less than four lakes)</u>  |                   |    |       |      |        |  |
| <i>Pseudokiefferiella parva</i> (Edwards)               | Diamesinae        | -  | 2     | n/c  | n/c    |  |
| <i>Brillia</i> sp.                                      | Orthoclaadiinae   | -  | 1     | n/c  | n/c    |  |
| <i>Corynoneura</i> cf. <i>lobata</i> Edwards            | Orthoclaadiinae   | -  | 1     | n/c  | n/c    |  |
| <i>Cricotopus pulchripes</i> -type                      | Orthoclaadiinae   | -  | 3     | n/c  | n/c    |  |
| <i>Cricotopus</i> species A                             | Orthoclaadiinae   | -  | 1     | n/c  | n/c    |  |
| <i>Cricotopus</i> gr. <i>obnixus</i>                    | Orthoclaadiinae   | -  | 1     | n/c  | n/c    |  |
| <i>Heterotanytarsus</i> sp.                             | Orthoclaadiinae   | -  | 1     | n/c  | n/c    |  |
| <i>Paraccladius</i> sp.                                 | Orthoclaadiinae   | -  | 3     | n/c  | n/c    |  |
| <i>Parakiefferiella coronata</i> (Edwards)              | Orthoclaadiinae   | -  | 1     | n/c  | n/c    |  |
| <i>Parorthoclaadius</i> sp.                             | Orthoclaadiinae   | -  | 2     | n/c  | n/c    |  |
| <i>Psectrocladius</i> ( <i>Mesopsectrocladius</i> ) sp. | Orthoclaadiinae   | -  | 2     | n/c  | n/c    |  |
| <i>Rheocricotopus</i> sp.                               | Orthoclaadiinae   | -  | 1     | n/c  | n/c    |  |
| <i>Tvetenia</i> sp.                                     | Orthoclaadiinae   | -  | 1     | n/c  | n/c    |  |
| <i>Dicrotendipes tritonus</i> (Kieffer)                 | Chironomini       | -  | 3     | n/c  | n/c    |  |
| <i>Einfeldia pagana</i> (Meigen)                        | Chironomini       | -  | 1     | n/c  | n/c    |  |
| <i>Parachironomus</i> gr. <i>arcuatus</i>               | Chironomini       | -  | 1     | n/c  | n/c    |  |
| <i>Phaenopsectra</i> sp.                                | Chironomini       | -  | 2     | n/c  | n/c    |  |
| <i>Stictochironomus</i> sp.                             | Chironomini       | -  | 1     | n/c  | n/c    |  |

## Appendix S2

| <b>Chironomidae (continued)</b>                    |                   |   |       |      |        |
|----------------------------------------------------|-------------------|---|-------|------|--------|
| Species name                                       | Subfamily / tribe | # | Freq. | Bias | Narrow |
| <i>Micropsectra insignilobus</i> -type             | Tanytarsini       | - | 1     | n/c  | n/c    |
| <i>Neozavrelia</i> B-type                          | Tanytarsini       | - | 1     | n/c  | n/c    |
| <i>Stempellinella</i> (?) sp.                      | Tanytarsini       | - | 1     | n/c  | n/c    |
| <i>Tanytarsus chinyensis</i> -type                 | Tanytarsini       | - | 2     | n/c  | n/c    |
| <i>Tanytarsus nemorosus</i> -type                  | Tanytarsini       | - | 2     | n/c  | n/c    |
| <u>Discarded (not determined to species level)</u> |                   |   |       |      |        |
| <i>Zavrelimyia</i> spp.                            | Tanypodinae       | - | 45    | n/c  | n/c    |
| <i>Procladius</i> spp.                             | Tanypodinae       | - | 47    | n/c  | n/c    |
| <i>Diamesa</i> spp.                                | Diamesinae        | - | 4     | n/c  | n/c    |
| <i>Pseudodiamesa</i> spp.                          | Diamesinae        | - | 15    | n/c  | n/c    |
| <i>Corynoneura scutellata</i> -type                | Orthoclaadiinae   | - | 43    | n/c  | n/c    |
| <i>Orthocladus</i> spp.                            | Orthoclaadiinae   | - | 11    | n/c  | n/c    |
| <i>Psectrocladius octomaculatus</i> -type (spp.)   | Orthoclaadiinae   | - | 34    | n/c  | n/c    |
| <i>Chironomus / Einfeldia</i> C-type               | Chironomini       | - | 4     | n/c  | n/c    |
| <i>Micropsectra aristata</i> -type (spp.)          | Tanytarsini       | - | 35    | n/c  | n/c    |
| <i>Tanytarsus mendax</i> -type                     | Tanytarsini       | - | 16    | n/c  | n/c    |

## Appendix S2

### Insecta (other)

| Species name                                     | Family (Order)                  | #  | Freq. | Bias | Narrow |
|--------------------------------------------------|---------------------------------|----|-------|------|--------|
| <i>Aeshna</i> sp.                                | Aeshnidae (Odonata)             | 1  | 4     | [-]  |        |
| <i>Cloëon schoenemundi</i> Bengtsson             | Baetidae (Ephemeroptera)        | 4  | 19    | [-]  | *      |
| <i>Capnia vidua</i> Klapálek                     | Capniidae (Plecoptera)          | 14 | 4     | [+]  |        |
| <i>Arctocoris carinata</i> (Sahlberg)            | Corixidae (Hemiptera)           | 5  | 7     |      |        |
| <i>Sialis lutaria</i> (Linnaeus)                 | Sialidae (Megaloptera)          | 7  | 46    | [-]  | *      |
| <i>Boreonectes cf. ibericus</i> (Dutton & Angus) | Dytiscidae (Coleoptera)         | 8  | 7     |      |        |
| <i>Oreodytes cf. sanmarkii</i> (Sahlberg)        | Dytiscidae (Coleoptera)         | 11 | 4     |      |        |
| <i>Agabus cf. bipustulatus</i> (Linnaeus)        | Dytiscidae (Coleoptera)         | 12 | 14    |      |        |
| <i>Platambus maculatus</i> (Linnaeus)            | Dytiscidae (Coleoptera)         | 3  | 7     |      |        |
| <i>Plectrocnemia cf. laetabilis</i> McLachlan    | Polycentropodidae (Trichoptera) | 9  | 25    |      | *      |
| <i>Polycentropus flavomaculatus</i> (Pictet)     | Polycentropodidae (Trichoptera) | 6  | 24    | [-]  | *      |
| <i>Drusus cf. rectus</i> (McLachlan)             | Limnephilidae (Trichoptera)     | 13 | 6     | [+]  | *      |
| <i>Annitella cf. pyrenaea</i> (Navás)            | Limnephilidae (Trichoptera)     | 10 | 27    |      |        |
| <i>Mystacides azurea</i> (Linnaeus)              | Leptoceridae (Trichoptera)      | 2  | 12    | [-]  | *      |

#### Discarded (present in less than four lakes)

|                                            |                                 |   |   |     |     |
|--------------------------------------------|---------------------------------|---|---|-----|-----|
| <i>Enallagma cyathigerum</i> (Charp)       | Coenagrionidae (Odonata)        | - | 1 | n/c | n/c |
| <i>Caenis horaria</i> (Linnaeus)           | Caenidae (Ephemeroptera)        | - | 2 | n/c | n/c |
| <i>Ecdyonurus cf. forcipula</i> (Pictet)   | Heptageniidae (Ephemeroptera)   | - | 1 | n/c | n/c |
| <i>Electrogena lateralis</i> (Curtis)      | Heptageniidae (Ephemeroptera)   | - | 1 | n/c | n/c |
| <i>Habroleptoides gr. umbratilis</i>       | Leptophlebiidae (Ephemeroptera) | - | 1 | n/c | n/c |
| <i>Siphonurus lacustris</i> Eaton          | Siphonuridae (Ephemeroptera)    | - | 1 | n/c | n/c |
| <i>Arcynopteryx compacta</i> (McLachlan)   | Perlodidae (Plecoptera)         | - | 3 | n/c | n/c |
| <i>Perlodes intricata</i> (Pictet)         | Perlodidae (Plecoptera)         | - | 2 | n/c | n/c |
| <i>Siphonoperla torrentium</i> (Pictet)    | Chloroperlidae (Plecoptera)     | - | 3 | n/c | n/c |
| <i>Nemoura cinerea</i> Retzius             | Nemouridae (Plecoptera)         | - | 3 | n/c | n/c |
| <i>Nemoura mortoni</i> Ris                 | Nemouridae (Plecoptera)         | - | 1 | n/c | n/c |
| <i>Nemurella pictetii</i> Klapálek         | Nemouridae (Plecoptera)         | - | 1 | n/c | n/c |
| <i>Leuctra leptogaster</i> Aubert          | Leuctridae (Plecoptera)         | - | 2 | n/c | n/c |
| <i>Micronecta poweri</i> (Douglas & Scott) | Corixidae (Hemiptera)           | - | 1 | n/c | n/c |
| <i>Halipilus cf. fulvus</i> (Fabricius)    | Haliplidae (Coleoptera)         | - | 3 | n/c | n/c |
| <i>Helophorus</i> sp.                      | Helophoridae (Coleoptera)       | - | 1 | n/c | n/c |
| <i>Elmis</i> sp.                           | Elmidae (Coleoptera)            | - | 1 | n/c | n/c |
| <i>Limonia</i> sp.                         | Limoniidae (Diptera)            | - | 1 | n/c | n/c |
| <i>Erioptera</i> sp.                       | Limoniidae (Diptera)            | - | 1 | n/c | n/c |
| <i>Limnophila</i> sp.                      | Limoniidae (Diptera)            | - | 1 | n/c | n/c |
| <i>Simulium</i> sp.                        | Simuliidae (Diptera)            | - | 1 | n/c | n/c |
| <i>Chrysops</i> sp.                        | Tabanidae (Diptera)             | - | 1 | n/c | n/c |
| <i>Lispe</i> sp.                           | Muscidae (Diptera)              | - | 1 | n/c | n/c |
| <i>Agrypnia</i> sp.                        | Phryganeidae (Trichoptera)      | - | 1 | n/c | n/c |
| <i>Potamophylax latipennis</i> (Curtis)    | Limnephilidae (Trichoptera)     | - | 3 | n/c | n/c |
| <i>Limnephilus cf. gadarramicus</i> Schmid | Limnephilidae (Trichoptera)     | - | 3 | n/c | n/c |
| <i>Thremma gallicum</i> McLachlan          | Limnephilidae (Trichoptera)     | - | 3 | n/c | n/c |
| <i>Athripsodes aterrimus</i> (Stephens)    | Leptoceridae (Trichoptera)      | - | 1 | n/c | n/c |

#### Discarded (not determined to species level)

|                                     |                           |   |    |     |     |
|-------------------------------------|---------------------------|---|----|-----|-----|
| <i>Hydroporus</i> spp. <sup>2</sup> | Dytiscidae (Coleoptera)   | - | 28 | n/c | n/c |
| Ceratopogonidae (undetermined)      | Ceratopogonidae (Diptera) | - | 6  | n/c | n/c |

<sup>2</sup> Only one species was found in our lake survey, *H. foveolatus* Heer, but the genus is highly diversified in the Pyrenees (Ribera et al., 1993), and other species are likely present.

## Appendix S2

### References

- Heiri, O., T. Ekrem, and E. Willassen. 2004. Larval head capsules of European *Micropsectra*, *Paratanytarsus* and *Tanytarsus* (Diptera: Chironomidae: Tanytarsini). Version 1.0, August 24, 2004. <http://www3.bio.uu.nl/palaeo/Chironomids/Tanytarsini/Intro.htm> [Downloaded on March 20, 2007].
- Ribera, I., C. Hernando, X. Fresneda, P. Aguilera, G. N. Foster, and S. Bignal. 1993. A preliminary checklist of the Hydradephaga from the Pyrenees. *Latissimus* 3:6–10.
